# Supplementary material
Source: PubMed Central journal article supplement (PMC2937565)

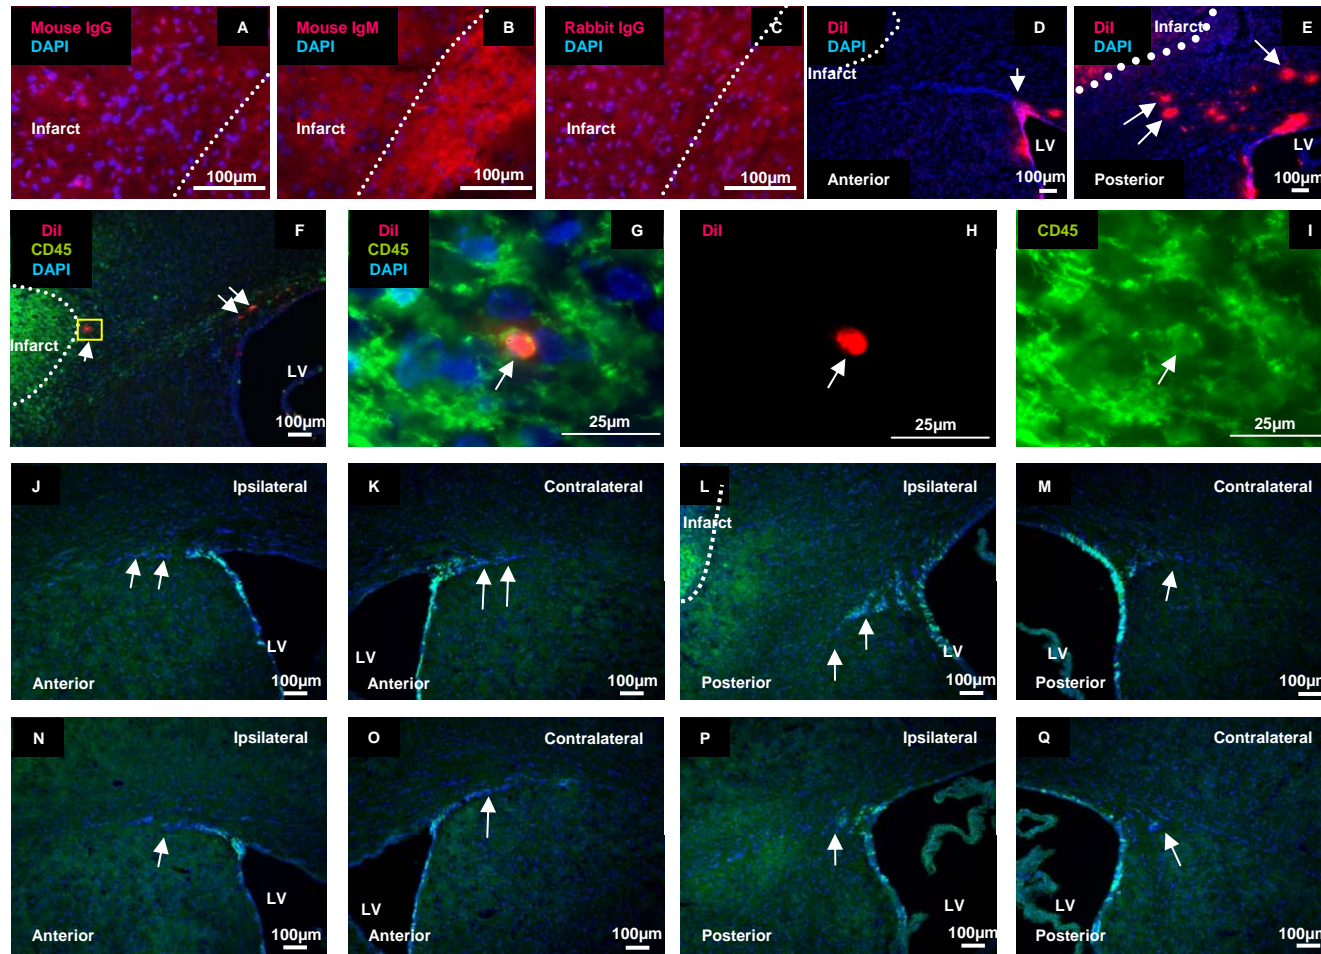

Supplement: NIHMS229499-supplement.pdf [file NIHMS229499-supplement.pdf]
